# Supplementary material
Source: Research Square preprint supplement (doi:10.21203/rs.3.rs-9507474/v1)
Supplement: Supplementary file 1 [file ca7e6f874ab493b19f93849c.docx]

**Appendix**

**Appendix Table 1A.** Participant Characteristics (Continuous Variables)

| **Biological Variable** | **Mean (SD)** |
| --- | --- |
| Physical activity level( IPAQ-7) | 1845.84(2392.93) |
| **Psychological Variable** | **Mean (SD)** |
|
| Perceived stress (PSS-4) | 8.07(3.82) |
| General Self-Efficacy(NGSES-SF) | 10.97(2.59) |
| Extraversion(BFI-10) | 3.64(0.96) |
| Agreeableness(BFI-10) | 3.76(0.86) |
| Conscientiousness(BFI-10) | 3.80(0.88) |
| Neuroticism(BFI-10) | 3.56(0.94) |
| Openness(BFI-10) | 3.43(0.98) |
| ADHD(ASRS) | 12.06(5.44) |
| **Social Variable** | **Mean (SD)** |
| Health Literacy(HLS-SF4) | 11.18(2.782) |
| Family Communication(FCS-SF) | 14.68(3.80) |
| Social support(PSSS-SF) | 15.33(4.06) |

**Appendix Table 2A.** Supplementary Structural Model

| **Path Analysis1** | **Effect Type** | **Path Coefficient** | **VIF** | **T Value** | **p Value** |
| --- | --- | --- | --- | --- | --- |
| Social → Psychological | Direct | 0.715 | 1.000 | 157.550 | 0.000 |
| Psychological → Biological | Direct | 0.133 | 2.048 | 7.877 | 0.000 |
| Social → Biological | Direct | 0.168 | 2.048 | 9.288 | 0.000 |
| Biological →EQ-5D-5L utility | Total effect | 0.263 | — | 33.793 | 0.000 |
| Psychological →EQ-5D-5L utility | Total effect | 0.231 | — | 22.838 | 0.000 |
| Social →EQ-5D-5L utility | Total effect | 0.313 | — | 37.554 | 0.000 |
| **Path Analysis1** | **Effect Type** | **Path Coefficient** | **VIF** | **T Value** | **p Value** |
| Social → Psychological | Direct | 0.721 | 1.000 | 167.185 | 0.000 |
| Psychological → Biological | Direct | 0.158 | 2.080 | 9.565 | 0.000 |
| Social → Biological | Direct | 0.152 | 2.080 | 8.647 | 0.000 |
| Biological →EQ-VAS utility | Total effect | 0.178 | — | 26.960 | 0.000 |
| Psychological →EQ-VAS utility | Total effect | 0.266 | — | 26.699 | 0.000 |
| Social →EQ-VAS utility | Total effect | 0.398 | — | 60.359 | 0.000 |

1 Model 1 takes EQ-5D-5L utility as the dependent variable.

2 Model 2 takes EQ-VAS as the dependent variable.

**Appendix Table 3A.** Model fit of the extended model

| EQ-5D Fit Indices | Education1 | | | Age2 | | | Region | | | Sex | | income | |
| --- | --- | --- | --- | --- | --- | --- | --- | --- | --- | --- | --- | --- | --- |
| Low | Middle | High | Young | Middle | Old | Eastern | Central | Western | Male | Female | ≤4000 | ＞4000 |
| Saturated Model -SRMR | 0.044 | 0.043 | 0.041 | 0.029 | 0.033 | 0.038 | 0.045 | 0.057 | 0.049 | 0.048 | 0.047 | 0.054 | 0.046 |
| Estimated Model-SRMR | 0.044 | 0.043 | 0.041 | 0.029 | 0.033 | 0.038 | 0.045 | 0.057 | 0.049 | 0.048 | 0.047 | 0.054 | 0.046 |
| Saturated Model -NFI | 0.900 | 0.903 | 0.928 | 0.939 | 0.938 | 0.929 | 0.895 | 0.864 | 0.876 | 0.887 | 0.875 | 0.867 | 0.887 |
| Estimated Model-NFI | 0.900 | 0.903 | 0.928 | 0.939 | 0.938 | 0.929 | 0.895 | 0.864 | 0.876 | 0.887 | 0.875 | 0.867 | 0.887 |
| VAS Fit Indices | Education | | | Age | | | Region | | | Sex | | income | |
| Low | Middle | High | Young | Middle | Old | Eastern | Central | Western | Male | Female | ≤4000 | ＞4000 |
| Saturated Model -SRMR | 0.041 | 0.040 | 0.037 | 0.027 | 0.027 | 0.033 | 0.042 | 0.051 | 0.048 | 0.045 | 0.045 | 0.051 | 0.044 |
| Estimated Model-SRMR | 0.041 | 0.040 | 0.037 | 0.027 | 0.027 | 0.033 | 0.042 | 0.051 | 0.048 | 0.045 | 0.045 | 0.051 | 0.044 |
| Saturated Model -NFI | 0.908 | 0.910 | 0.935 | 0.941 | 0.948 | 0.938 | 0.902 | 0.871 | 0.879 | 0.893 | 0.881 | 0.874 | 0.894 |
| Estimated Model-NFI | 0.908 | 0.910 | 0.935 | 0.941 | 0.948 | 0.938 | 0.902 | 0.871 | 0.879 | 0.893 | 0.881 | 0.874 | 0.894 |

| EQ-5D Fit Indices | Marriage | | | Residence | | Smoking | | Drinking | | Chronic disease | |
| --- | --- | --- | --- | --- | --- | --- | --- | --- | --- | --- | --- |
| Single | Married | Other3 | Urban | Rural | Yes | No | Yes | No | Yes | No |
| Saturated Model -SRMR | 0.046 | 0.045 | 0.050 | 0.045 | 0.050 | 0.052 | 0.046 | 0.051 | 0.046 | 0.051 | 0.047 |
| Estimated Model-SRMR | 0.046 | 0.045 | 0.050 | 0.045 | 0.050 | 0.052 | 0.046 | 0.051 | 0.046 | 0.051 | 0.047 |
| Saturated Model -NFI | 0.881 | 0.886 | 0.848 | 0.886 | 0.874 | 0.884 | 0.883 | 0.871 | 0.885 | 0.875 | 0.901 |
| Estimated Model-NFI | 0.881 | 0.886 | 0.848 | 0.886 | 0.874 | 0.884 | 0.883 | 0.871 | 0.885 | 0.875 | 0.901 |
| VAS Fit Indices | Marriage | | | Residence | | Smoking | | Drinking | | Chronic disease | |
| Single | Married | Other | Urban | Rural | Yes | No | Yes | No | Yes | No |
| Saturated Model -SRMR | 0.044 | 0.043 | 0.047 | 0.043 | 0.048 | 0.048 | 0.045 | 0.049 | 0.043 | 0.048 | 0.044 |
| Estimated Model-SRMR | 0.044 | 0.043 | 0.047 | 0.043 | 0.048 | 0.048 | 0.045 | 0.049 | 0.043 | 0.048 | 0.044 |
| Saturated Model -NFI | 0.888 | 0.891 | 0.861 | 0.892 | 0.883 | 0.890 | 0.889 | 0.875 | 0.893 | 0.884 | 0.908 |
| Estimated Model-NFI | 0.888 | 0.891 | 0.861 | 0.892 | 0.883 | 0.890 | 0.889 | 0.875 | 0.893 | 0.884 | 0.908 |

1 Primary education and below is low education, junior and senior high school (including vocational) is intermediate, and bachelor's degree and above (including associate degree) is higher education.

2 18-34 years old are considered young adults, 35-54 years old are middle-aged, and 55 years and above are elderly.

3 Others include divorce or widowhood.
